# Supplementary material for: Multi-omics analysis of the characteristic components of Apis cerana honey from Changbai Mountain
Source: Research Square preprint supplement (doi:10.21203/rs.3.rs-6787940/v1), 2025-06-09
Supplement: Supplementary file 1 [file 04b0bc2165f9156e9574f0fd.xlsx]

## Sheet: Sheet1
Supplementary Table 2. Potential characteristic metabolites of CBS honey
Index	Compounds	Class I	Formula	CBS_vs_XZ	CBS_vs_AB	CBS_vs_QZ	CBS_vs_SN	CBS-1	CBS-2	CBS-3	XZ-1	XZ-2	XZ-3	AB-1	AB-2	AB-3	QZ-1	QZ-2	QZ-3	SN-1	SN-2	SN-3
Lmhp002764	Cyclo(Pro-Leu)*	Amino acids and derivatives	C11H18N2O2	TRUE	FALSE	FALSE	FALSE	106521	118706	109273	28871.3	29910.7	29767.4	69684.1	65030.4	75128.9	91963.4	108398	99127.9	85760	99361.9	96817.8
pmf0470	cis-4-Hydroxy-D-proline*	Amino acids and derivatives	C5H9NO3	FALSE	FALSE	TRUE	FALSE	8.41042e+06	8.34717e+06	8.10499e+06	1.32536e+07	1.39223e+07	1.209e+07	5.23678e+06	5.69114e+06	5.24665e+06	2.20268e+06	2.1579e+06	2.32783e+06	1.04387e+07	1.08431e+07	9.7961e+06
mws0216	Hydroxyproline*	Amino acids and derivatives	C5H9NO3	FALSE	FALSE	TRUE	FALSE	8.41042e+06	8.34717e+06	8.10499e+06	1.32536e+07	1.39223e+07	1.209e+07	5.23678e+06	5.69114e+06	5.24665e+06	2.20268e+06	2.1579e+06	2.32783e+06	1.04387e+07	1.08431e+07	9.7961e+06
MWS04455	cis-3-Hydroxy-L-proline*	Amino acids and derivatives	C5H9NO3	FALSE	FALSE	TRUE	FALSE	8.41042e+06	8.34717e+06	8.10499e+06	1.32536e+07	1.39223e+07	1.209e+07	5.23678e+06	5.69114e+06	5.24665e+06	2.20268e+06	2.1579e+06	2.32783e+06	1.04387e+07	1.08431e+07	9.7961e+06
Wahlp08069	LysoPC 17:2(2n isomer)*	Lipids	C25H48NO7P	FALSE	FALSE	TRUE	FALSE	23252.2	22351.9	20793	14007.9	19154.8	23934.2	14742.4	6700.04	11944.8	1340.01	1340.01	1340.01	18785	17029.6	22168.8
Lcfp100016	3-Methylsubericacid	Lipids	C9H16O4	FALSE	FALSE	FALSE	TRUE	22995.2	22948.2	26289.9	15272	21706.9	32556.1	27218.2	39013.8	24777.6	38449.4	18126.6	9940.35	1988.07	1988.07	1988.07
MWS201403	Lys-Ala	Amino acids and derivatives	C9H19N3O3	FALSE	FALSE	TRUE	FALSE	756980	850710	706351	816323	788080	830439	402790	374220	417112	74844	74844	74844	710551	671173	805952
pme1306	Pyridoxine phosphate	Others	C8H12NO6P	FALSE	FALSE	TRUE	FALSE	32464.6	36211.3	28905.8	18019.8	16572.6	17121.1	17422.7	36192.6	47798.8	3023.5	3023.5	3023.5	43606.2	27537.2	15117.5
MWS201411	Lys-Asn	Amino acids and derivatives	C10H20N4O4	FALSE	FALSE	TRUE	FALSE	127338	133288	129226	136641	129275	145211	167764	168796	202474	19997.5	19997.5	19997.5	139607	122915	117075
PDP061473	(9Z,11Z)-13-hydroxyhexadeca-9,11-dienoic acid	Lipids	C16H28O3	TRUE	TRUE	TRUE	TRUE	257597	228614	198554	6315.17	6315.17	6315.17	6315.17	6315.17	6315.17	6315.17	6315.17	6315.17	6315.17	6315.17	6315.17
pmb2799	12(13)-EpOME	Lipids	C18H32O3	FALSE	FALSE	TRUE	FALSE	56508.9	56497.8	50330	64440.6	32510.2	46151.5	68326.3	59746.2	52105.8	6502.04	6502.04	6502.04	70358.5	83699.5	86805.7
pma6455	D-Ribulose 5-phosphate	Others	C5H11O8P	TRUE	FALSE	FALSE	FALSE	170463	186801	155775	23682	23682	23682	196652	181738	227390	315369	263481	255346	118410	146393	167635
Note：*denotes the isomeric form
