# Supplementary material for: Multi-omics analysis of the characteristic components of Apis cerana honey from Changbai Mountain
Source: Research Square preprint supplement (doi:10.21203/rs.3.rs-6787940/v1), 2025-06-09
Supplement: Supplementary file 2 [file 082dd12bb73244b3723f2e2c.xlsx]

## Sheet: all_DEPs_annotation
	Supplementary Table 3. Potential characteristic proteins of CBS honey
Accession	Gene	Description	CBS-1	CBS-2	CBS-3	XZ-1	XZ-2	XZ-3	AB-1	AB-2	AB-3	QZ-1	QZ-2	QZ-3	SN-1	SN-2	SN-3	CBS_vs_XZ	CBS_vs_AB	CBS_vs_QZ	CBS_vs_SN
A0A2A3E394	APICC_01685	mannose-6-phosphate isomerase OS=Apis cerana cerana OX=94128 GN=APICC_01685 PE=3 SV=1	41.9942	50.8738	65.7296	31.9827	18.5997	19.0017	31.9636	0	34.8763	0	61.5137	66.1457	40.0476	38.1709	34.803	TRUE	FALSE	FALSE	FALSE
A0A2A3E4G3	APICC_05792	MD-2-related lipid-recognition domain-containing protein OS=Apis cerana cerana OX=94128 GN=APICC_05792 PE=3 SV=1	0.70316	0.525953	0.702808	0.708323	1.20922	0.727335	1.08288	0.601152	0.639628	0.767713	0.583194	0.814055	0.446966	0.457446	0.248294	FALSE	FALSE	FALSE	TRUE
A0A2A3E4S5	APICC_01096	Serine proteinase stubble OS=Apis cerana cerana OX=94128 GN=APICC_01096 PE=3 SV=1	2.42649	2.53691	2.52391	2.47532	3.40355	3.31623	3.05025	3.14011	3.37084	3.29784	2.89818	2.58052	1.6297	1.53021	1.55709	FALSE	FALSE	FALSE	TRUE
A0A2A3E771	APICC_04696	Solute carrier family 2, facilitated glucose transporter member OS=Apis cerana cerana OX=94128 GN=APICC_04696 PE=4 SV=1	6.00384	5.95425	6.70922	3.93591	3.96028	4.18773	6.57947	5.81855	5.51108	11.9057	8.0989	10.8241	5.69503	7.40329	7.44237	TRUE	FALSE	FALSE	FALSE
A0A2A3EAC4	APICC_00562	Alpha-galactosidase OS=Apis cerana cerana OX=94128 GN=APICC_00562 PE=3 SV=1	0.588628	0.423128	0.423149	0.220607	0.297922	0.321083	0.699728	0.335802	0.528077	0.541268	0.421036	0.632874	0.656207	0.49157	0.441237	TRUE	FALSE	FALSE	FALSE
A0A2A3EDE3	APICC_03450	Hymenoptaecin OS=Apis cerana cerana OX=94128 GN=APICC_03450 PE=4 SV=1	0.619837	0.355871	0.431607	0.371683	0.421263	0.333319	0	0	0	0.266188	0.624286	0.403313	0.324784	0.116641	0.284086	FALSE	TRUE	FALSE	FALSE
A0A2A3EDR1	APICC_06442	Vacuolar proton pump subunit B OS=Apis cerana cerana OX=94128 GN=APICC_06442 PE=3 SV=1	0.940466	1.36028	0.866071	0.711584	1.09292	0.619031	0.257283	0	0	0.68569	0.500785	0.595515	0.634932	0.70553	0.765332	FALSE	TRUE	FALSE	FALSE
A0A2A3EFH2	APICC_08137	S-adenosylmethionine synthase OS=Apis cerana cerana OX=94128 GN=APICC_08137 PE=3 SV=1	0.689161	0.545842	0.780293	0.40584	0.28547	0.232471	0.66027	0.467866	0.383125	0.35915	0.815828	0	0.348208	0	0.595298	TRUE	FALSE	FALSE	FALSE
A0A2A3EHG0	APICC_10171	Hyaluronidase OS=Apis cerana cerana OX=94128 GN=APICC_10171 PE=3 SV=1	1.46248	1.32948	1	0.423567	0.396682	0.362159	0.329348	0.290547	0.13959	0.651093	0.562961	0.971671	0.415488	0.86689	0.777899	TRUE	TRUE	TRUE	TRUE
A0A2A3EIU8	APICC_07862	Glutamate receptor U1 OS=Apis cerana cerana OX=94128 GN=APICC_07862 PE=4 SV=1	408.497	412.345	445.12	233.503	195.376	212.785	330.88	338.818	313.965	492.631	431.906	452.246	357.011	403.382	416.599	TRUE	FALSE	FALSE	FALSE
A0A2A3EMA9	APICC_09184	Glucosylceramidase OS=Apis cerana cerana OX=94128 GN=APICC_09184 PE=3 SV=1	53.924	50.7592	53.8186	28.0154	31.303	32.9588	47.4622	40.0501	40.4054	73.8067	69.283	62.0909	49.3822	50.411	47.3195	TRUE	FALSE	FALSE	FALSE
A0A2A3EPJ1	APICC_08085	Chymotrypsin inhibitor OS=Apis cerana cerana OX=94128 GN=APICC_08085 PE=4 SV=1	214.148	194.678	213.806	95.2106	107.935	105.908	226.347	198.496	190.644	264.529	219.702	184.909	188.006	233.404	209.3	TRUE	FALSE	FALSE	FALSE
A0A2A3EPZ0	APICC_04206	Peroxidasin OS=Apis cerana cerana OX=94128 GN=APICC_04206 PE=4 SV=1	0.545411	0.586394	0.748074	0.584771	0.80081	0.819126	0.974181	0.808206	0.657029	0.390325	0.277704	0.378647	0.652272	1.04266	0.687458	FALSE	FALSE	TRUE	FALSE
