# Supplementary material for: Multi-omics analysis of the characteristic components of Apis cerana honey from Changbai Mountain
Source: Research Square preprint supplement (doi:10.21203/rs.3.rs-6787940/v1), 2025-06-09
Supplement: Supplementary file 3 [file 6391bbc240a93fb2b2b61882.xlsx]

## Sheet: Sheet1
Supplementary Table 4. Correlation between differential proteins and differential metabolites
protID	Log2FC_prot	KO	metaID	Log2FC_meta	Compounds	coefficient	pvalue	ninequadrants
A0A2A3EPJ1	1.01052	--	pme0008	-1.06017	L-Citrulline	-0.84745	6.64699e-05	9
A0A2A3E771	0.627426	K14258	pma6455	2.85224	D-Ribulose 5-phosphate	0.834878	0.000107721	3
A0A2A3EIU8	0.980344	K05313	PD0280915	-1.2379	Leu Ser Ile*	-0.934836	3.28112e-07	9
A0A2A3EMA9	0.780453	K01201	PD0280915	-1.2379	Leu Ser Ile*	-0.896302	6.11247e-06	9
A0A2A3EHG0	1.68121	K01197	MWS201471	-1.12723	Lys-Tyr	-0.8071	0.000275611	9
A0A2A3EHG0	0.880105	K01197	PDP228396	1.14823	(5e,10r)-10-methyl-7,8,9,10-tetrahydro-3h-oxecine-2,4-dione	0.80863	0.000262741	3
A0A2A3E4S5	0.666576	K01362	Lcfn121066	-1.3081	Glu-Glu-Phe	-0.817363	0.000198349	9
A0A2A3EDE3	0.955876	--	Sasp001236	-2.32052	7-Hydroxy-tryptophan	-0.801284	0.000329326	9
A0A2A3EDR1	0.588668	K02147	Safp001796	-2.83062	4-Hydroxy-L-tryptophan	-0.832289	0.000118401	9
A0A2A3E771	-0.723763	K14258	Lmqn000432	1.77907	sn-Glycero-3-phospho-1-inositol	-0.812306	0.000233826	1
A0A2A3EPZ0	0.844825	K19511	Lmbn001288	-1.2336	(S)-2-Acetolactate	-0.800313	0.000339081	9
A0A2A3EDR1	3.6216	K02147	pme0124	-2.04501	L-Glycyl-L-proline	-0.828683	0.00013471	9
