# Supplementary material for: Multi-omics analysis of the characteristic components of Apis cerana honey from Changbai Mountain
Source: Research Square preprint supplement (doi:10.21203/rs.3.rs-6787940/v1), 2025-06-09
Supplement: Supplementary file 4 [file 6d935eba5bcfc9c99b4acc78.xlsx]

## Sheet: Table S1
Supplementary Table 1. Description of the analyzed honey samples
Symbol	Bee species	Location	Longitude	Latitude	Altitude (m)
CBS	Apis cerana in Changbai Mountain	Malugou, Baishan, Jilin	128.041	41.3156	812
XZ	Apis cerana in Tibet	Suotong, Bomi, Tibet	95.1719	30.0114	2382
QZ	Apis cerana hainana	Hongmao, Qiongzhong Li and Miao Autonomous County, Hainan	109.413	19.0203	759
SN	Apis cerana in central China	Songluo, Shennongjia Forestry District, Hubei	110.363	31.3941	1651
AB	Apis cerana abanisis	Maerkang, Ngawa, Sichuan	102.013	31.5809	2618
